# Supplementary material
Source: publisher figshare collection journal article supplement (https://sage.figshare.com/ndownloader/files/21239862)
Supplement: Supplementary file 1 [file 21239862]

**Supplemental File D: FAMILY BACKGROUND QUESTIONNAIRE FOR PARENTS**

1. Parent's age: Mother \_\_\_\_\_ Father \_\_\_\_\_

2. Which adults does the child participating in this study live with?

Mother ☐

Father ☐

Other caregiver(s) (please specify) \_\_\_\_\_

3. How many siblings does the child participating in this study have? \_\_\_\_\_

4. Please indicate gender, age, any developmental or major health concerns of any siblings below (please use space overleaf if there are more than 3 siblings)

|           | Gender<br>(M/F) | Age | Developmental / Health concerns? | Does this sibling<br>live with the child<br>participant? |
|-----------|-----------------|-----|----------------------------------|----------------------------------------------------------|
| Sibling 1 |                 |     |                                  |                                                          |
| Sibling 2 |                 |     |                                  |                                                          |
| Sibling 3 |                 |     |                                  |                                                          |

5. Is there any family history of autism, developmental delay, language disorder, hyperactivity or mental health problems? Please specify below.

---

---

---

---

6. Parent 1 (mother/father – delete as appropriate)

a. What is your highest qualification level?

High school ☐

Undergraduate degree ☐

Masters degree ☐

PhD ☐

Other (please specify below) ☐

Prefer not to answer ☐

b. What is your job title (e.g., primary school teacher, structural engineer)

\_\_\_\_\_

c. Are you working outside the home right now?

- Yes, Full time ☐
- Yes, Part time ☐
- Not working ☐

7. Parent 2 (mother/father/other caregiver – delete as appropriate)

a. What is your highest qualification level?

- High school ☐
- Undergraduate degree ☐
- Masters degree ☐
- PhD ☐
- Other (please specify below) ☐
- Prefer not to answer ☐

b. What is your job title (e.g., primary school teacher, structural engineer)

---

c. Are you working outside the home right now?

- Yes, Full time ☐
- Yes, Part time ☐
- Not working ☐

8. Please confirm that English is the main language spoken at home ☐

9. Please indicate any other languages your child is/has been exposed to:

| Language<br>(e.g. French, Urdu) | Source of exposure<br>(e.g. mother, grandparent) | Duration and amount of<br>exposure |
|---------------------------------|--------------------------------------------------|------------------------------------|
|                                 |                                                  |                                    |
|                                 |                                                  |                                    |
|                                 |                                                  |                                    |

10. This form was completed by:

- Mother ☐
- Father ☐
- Other caregiver specified above ☐

Date \_\_\_\_\_
